# Supplementary material
Source: PubMed Central journal article supplement (PMC3234812)
Supplement: supp_M111.295758_jbc.M111.295758-1.pdf [file supp_M111.295758_jbc.M111.295758-1.pdf]

## SUPPLEMENTAL FIGURE LEGENDS

SUPPLEMENTAL FIG. 1. Control pSTAT1 and pSTAT3 stimulations of primary T cells from wild-type and IL-6R-deficient mice. CD4<sup>+</sup> T cells were stimulated with mouse IL-6 (20 ng/ml) for 15 min. For intracellular staining of phosphorylated tyrosine residues of STAT1 and STAT3, cells were fixed in 2% (w/v) paraformaldehyde at 37°C for 15 min, followed by permeabilization in 90% methanol for 30 min on ice. Cells were stained for CD4 and A. phosphorylated STAT1 (clone 4a) or B. phosphorylated STAT3 (clone 4/P-STAT3).

SUPPLEMENTAL FIG. 2. pSTAT1 stimulations of primary T cells from wild-type and IL-6R deficient mice. CD4<sup>+</sup> T cells were stimulated with a combination of human IL-6 (10 ng/ml) and human sIL-6R (200 ng/ml) for 15 min in the presence of 10<sup>-1</sup>-10<sup>4</sup> ng/ml sgp130Fc. STAT1 activation was determined by flow cytometry. Normalized data are shown in Figure 6A. The upper two sets are from mouse number 1 and the lower two sets are from mouse number 2.

SUPPLEMENTAL FIG. 3. pSTAT3 stimulations of primary T cells from wild-type and IL-6R deficient mice. CD4<sup>+</sup> T cells were stimulated with a combination of human IL-6 (10 ng/ml) and human sIL-6R (200 ng/ml) for 15 min in the presence of 10<sup>-1</sup>-10<sup>4</sup> ng/ml sgp130Fc. STAT1 activation was determined by flow cytometry. Normalized data are shown in Figure 6B. The upper two sets are from mouse number 1 and the lower two sets are from mouse number 2.

# Supplemental Figure 1

## A

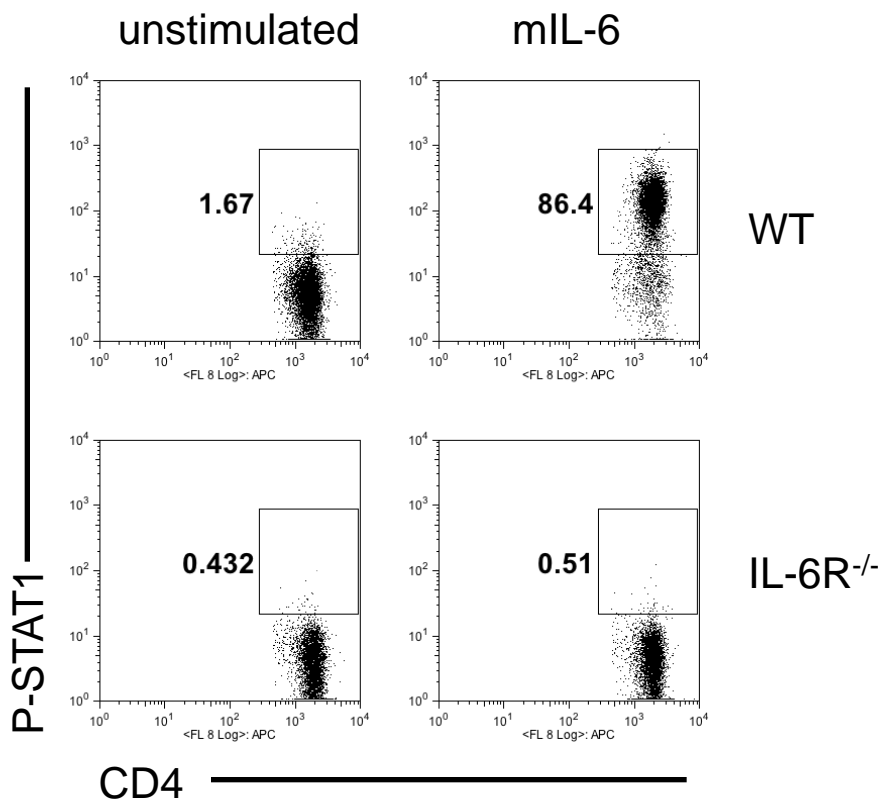

## B

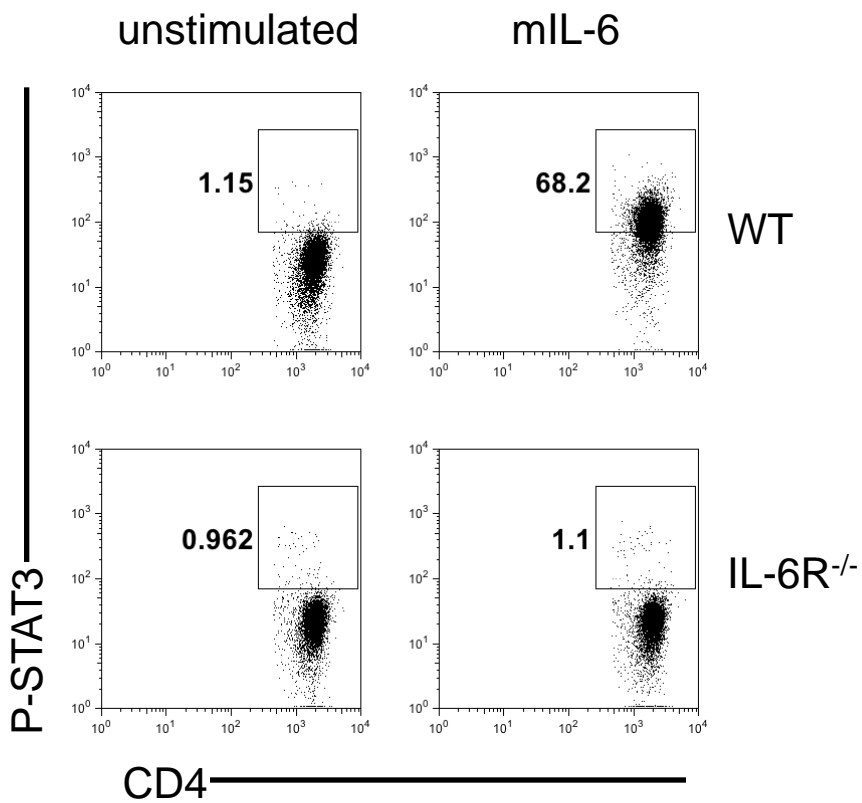

# Supplemental Figure 2

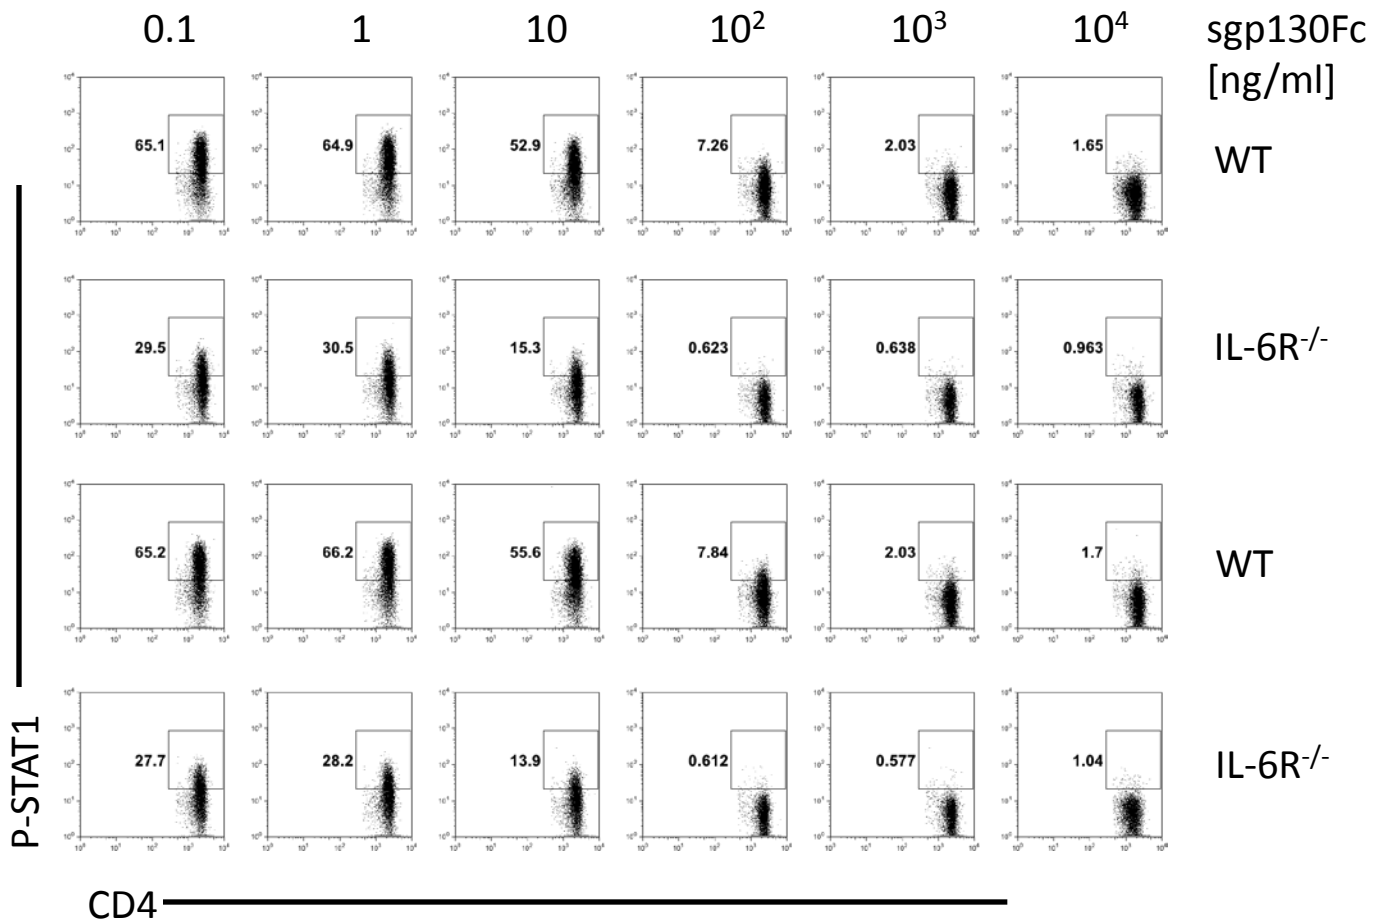

# Supplemental Figure 3

0.1      1      10       $10^2$        $10^3$        $10^4$

sgp130Fc  
[ng/ml]

WT

IL-6R<sup>-/-</sup>

WT

IL-6R<sup>-/-</sup>

P-STAT3

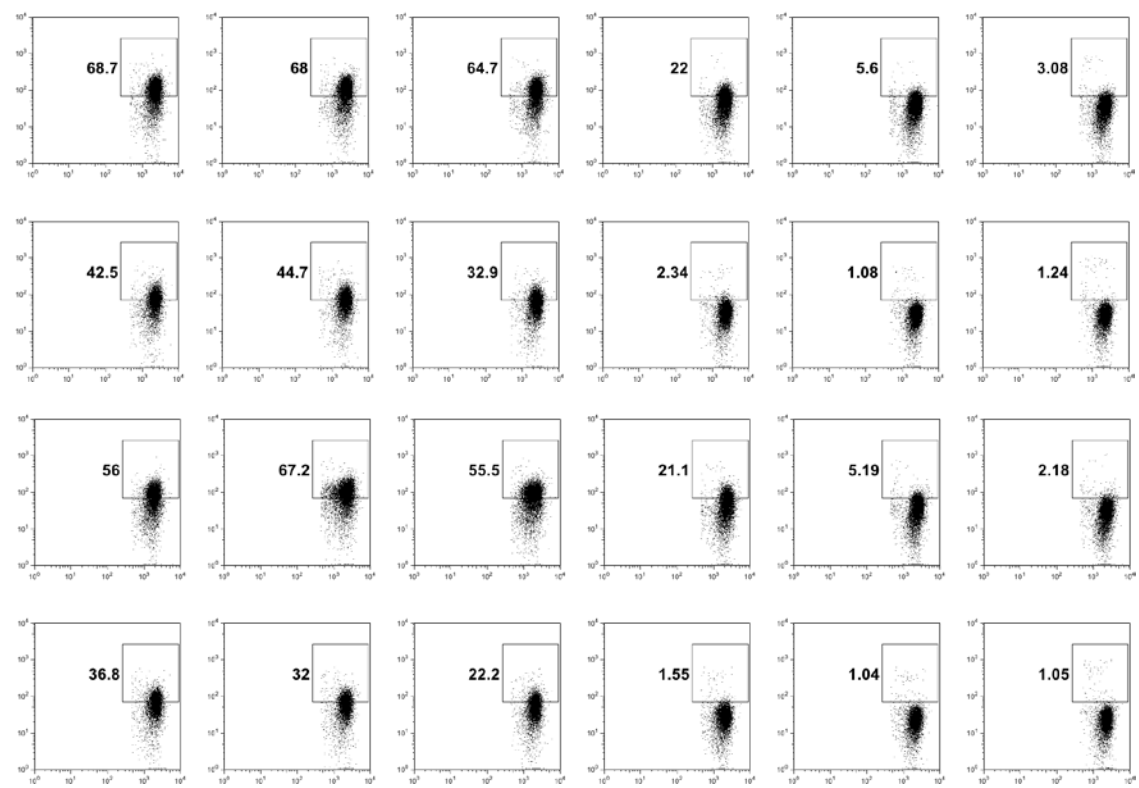

CD4
